# Supplementary material
Source: publisher site journal article supplement (https://www.dovepress.com/article/115706)
Supplement: Supplementary file 1 [file get_supplementary_file.php]

## Supplementary materials

**Table S1** Multivariable analysis of predictors for switching again within 6 months post-index

| Variable                                                                | OR ( $\beta$ ) | 95% CI      | P      |
|-------------------------------------------------------------------------|----------------|-------------|--------|
| Patient cohort (ref = TNFi cyclers)                                     |                |             |        |
| Non-TNFi switchers                                                      | 0.593          | 0.508–0.693 | <0.001 |
| Age group, years (ref = 55–64 years)                                    |                |             |        |
| 18–34                                                                   | 1.086          | 0.851–1.386 | 0.506  |
| 35–44                                                                   | 1.074          | 0.897–1.287 | 0.438  |
| 45–54                                                                   | 1.045          | 0.902–1.211 | 0.556  |
| Male (ref = female)                                                     | 0.999          | 0.850–1.174 | 0.987  |
| Plan type (ref = EPO/PPO)                                               |                |             |        |
| Comprehensive/indemnity                                                 | 0.795          | 0.549–1.150 | 0.223  |
| HMO                                                                     | 0.966          | 0.798–1.169 | 0.720  |
| POS/POS with capitation                                                 | 0.995          | 0.799–1.238 | 0.961  |
| Other                                                                   | 0.861          | 0.673–1.100 | 0.231  |
| Missing/unknown plan type                                               | 1.079          | 0.793–1.469 | 0.629  |
| Index year (ref = 2011)                                                 |                |             |        |
| 2010                                                                    | 0.908          | 0.764–1.081 | 0.278  |
| 2012                                                                    | 1.224          | 1.030–1.454 | 0.022  |
| 2013                                                                    | 1.586          | 1.325–1.898 | <0.001 |
| Region (ref = south)                                                    |                |             |        |
| Northeast                                                               | 1.014          | 0.841–1.223 | 0.885  |
| North Central                                                           | 0.972          | 0.821–1.151 | 0.742  |
| West                                                                    | 1.046          | 0.881–1.241 | 0.610  |
| Unknown                                                                 | 0.782          | 0.404–1.512 | 0.465  |
| Rural (ref = urban)                                                     | 0.970          | 0.816–1.153 | 0.730  |
| DCCI                                                                    | 0.977          | 0.902–1.058 | 0.568  |
| Hydroxychloroquine pre-index                                            | 0.906          | 0.777–1.055 | 0.205  |
| Leflunomide pre-index                                                   | 1.112          | 0.941–1.313 | 0.213  |
| Methotrexate pre-index                                                  | 0.814          | 0.716–0.925 | 0.002  |
| Sulfasalazine pre-index                                                 | 1.025          | 0.811–1.297 | 0.834  |
| Greater than or equal to one targeted DMARD type pre-index <sup>a</sup> | 0.903          | 0.700–1.165 | 0.432  |
| Total expenditure pre-index/US\$1,000                                   | 1.001          | 0.998–1.004 | 0.481  |
| RA-related total expenditure pre-index/US\$1,000                        | 1.000          | 0.992–1.007 | 0.960  |
| Office visit count pre-index                                            | 0.998          | 0.978–1.018 | 0.852  |
| PDC for RA medications pre-index                                        | 1.363          | 1.004–1.851 | 0.047  |
| Observations                                                            | 6,945          |             |        |
| C-statistic                                                             | 0.594          |             |        |

| Variable                 | OR ( $\beta$ ) | 95% CI | P |
|--------------------------|----------------|--------|---|
| Pseudo <i>R</i> -squared | 0.0170         |        |   |

**Note:** <sup>a</sup>The number of unique types of targeted DMARDs (reference, one type of targeted DMARD) that used all available claims at any time pre-index; all other pre-index variables were based on the 12-month pre-index period.

**Abbreviations:** CI, confidence interval; DCCI, Deyo–Charlson Comorbidity Index; DMARD, disease-modifying antirheumatic drug; EPO, exclusive provider organization; HMO, health maintenance organization; OR, odds ratio; PDC, proportion of days covered; POS, point of service; PPO, preferred provider organization; RA, rheumatoid arthritis; ref, reference; TNFi, tumor necrosis factor inhibitor.

**Table S2** Multivariable analysis of predictors for switching again within 12 months post-index

| Variable                                                                   | OR ( $\beta$ ) | 95% CI      | P      |
|----------------------------------------------------------------------------|----------------|-------------|--------|
| Patient cohort (ref = TNFi cyclers)                                        |                |             |        |
| Non-TNFi switchers                                                         | 0.762          | 0.677–0.858 | <0.001 |
| Age group, years (ref = 55–64 years)                                       |                |             |        |
| 18–34                                                                      | 0.968          | 0.792–1.184 | 0.755  |
| 35–44                                                                      | 1.124          | 0.971–1.301 | 0.118  |
| 45–54                                                                      | 1.088          | 0.966–1.225 | 0.163  |
| Male (ref = female)                                                        | 0.944          | 0.828–1.077 | 0.392  |
| Plan type (ref = EPO/PPO)                                                  |                |             |        |
| Comprehensive/indemnity                                                    | 0.934          | 0.706–1.236 | 0.633  |
| HMO                                                                        | 0.971          | 0.832–1.132 | 0.706  |
| POS/POS with capitation                                                    | 0.910          | 0.760–1.090 | 0.306  |
| Other                                                                      | 0.843          | 0.692–1.027 | 0.089  |
| Missing/unknown plan type                                                  | 0.881          | 0.683–1.136 | 0.329  |
| Index year (ref = 2011)                                                    |                |             |        |
| 2010                                                                       | 0.895          | 0.781–1.026 | 0.110  |
| 2012                                                                       | 1.083          | 0.943–1.244 | 0.258  |
| 2013                                                                       | 1.306          | 1.126–1.515 | <0.001 |
| Region (ref = south)                                                       |                |             |        |
| Northeast                                                                  | 0.999          | 0.858–1.163 | 0.991  |
| North Central                                                              | 0.893          | 0.779–1.023 | 0.104  |
| West                                                                       | 0.989          | 0.860–1.137 | 0.878  |
| Unknown                                                                    | 0.940          | 0.568–1.559 | 0.812  |
| Rural (ref = urban)                                                        | 1.014          | 0.883–1.166 | 0.839  |
| DCCI                                                                       | 0.992          | 0.931–1.057 | 0.812  |
| Hydroxychloroquine pre-index                                               | 0.950          | 0.841–1.073 | 0.407  |
| Leflunomide pre-index                                                      | 1.172          | 1.023–1.343 | 0.022  |
| Methotrexate pre-index                                                     | 0.950          | 0.856–1.054 | 0.330  |
| Sulfasalazine pre-index                                                    | 1.164          | 0.965–1.404 | 0.112  |
| Greater than or equal to one type of targeted DMARD pre-index <sup>a</sup> | 0.886          | 0.727–1.081 | 0.235  |
| Total expenditure pre-index/US\$1,000                                      | 1.000          | 0.998–1.003 | 0.859  |
| RA-related total expenditure pre-index/US\$1,000                           | 1.004          | 0.998–1.010 | 0.242  |
| Office visit count pre-index                                               | 1.004          | 0.988–1.020 | 0.649  |
| PDC for RA medications pre-index                                           | 1.185          | 0.925–1.519 | 0.179  |
| Observations                                                               | 6,945          |             |        |
| C-statistic                                                                | 0.563          |             |        |

| Variable                 | OR ( $\beta$ ) | 95% CI | P |
|--------------------------|----------------|--------|---|
| Pseudo <i>R</i> -squared | 0.00873        |        |   |

**Note:** <sup>a</sup>The number of unique types of targeted DMARDs (reference, one type of targeted DMARD) that used all available claims at any time pre-index; all other pre-index variables were based on the 12-month pre-index period.

**Abbreviations:** CI, confidence interval; DCCI, Deyo–Charlson Comorbidity Index; DMARD, disease-modifying antirheumatic drug; EPO, exclusive provider organization; HMO, health maintenance organization; OR, odds ratio; PDC, proportion of days covered; POS, point of service; PPO, preferred provider organization; RA, rheumatoid arthritis; ref, reference; TNFi, tumor necrosis factor inhibitor.

**Table S3** Multivariable analysis of predictors for treatment persistence for 12 months post-index

| Variable                                                                   | OR ( $\beta$ ) | 95% CI      | P     |
|----------------------------------------------------------------------------|----------------|-------------|-------|
| Patient cohort (ref = TNFi cyclers)                                        |                |             |       |
| Non-TNFi switchers                                                         | 1.206          | 1.078–1.349 | 0.001 |
| Age group, years (ref = 55–64 years)                                       |                |             |       |
| 18–34                                                                      | 0.900          | 0.745–1.087 | 0.275 |
| 35–44                                                                      | 0.897          | 0.779–1.032 | 0.129 |
| 45–54                                                                      | 0.921          | 0.822–1.032 | 0.156 |
| Male (ref = female)                                                        | 1.095          | 0.965–1.242 | 0.160 |
| Plan type (ref = EPO/PPO)                                                  |                |             |       |
| Comprehensive/indemnity                                                    | 1.170          | 0.894–1.533 | 0.253 |
| HMO                                                                        | 0.962          | 0.830–1.114 | 0.602 |
| POS/POS with capitation                                                    | 1.092          | 0.920–1.297 | 0.316 |
| Other                                                                      | 1.111          | 0.922–1.339 | 0.267 |
| Missing/unknown plan type                                                  | 1.210          | 0.949–1.542 | 0.124 |
| Index year (ref = 2011)                                                    |                |             |       |
| 2010                                                                       | 1.111          | 0.976–1.265 | 0.111 |
| 2012                                                                       | 0.949          | 0.831–1.083 | 0.436 |
| 2013                                                                       | 0.776          | 0.672–0.895 | 0.001 |
| Region (ref = south)                                                       |                |             |       |
| Northeast                                                                  | 0.957          | 0.827–1.106 | 0.550 |
| North Central                                                              | 1.166          | 1.023–1.328 | 0.021 |
| West                                                                       | 1.045          | 0.914–1.194 | 0.523 |
| Unknown                                                                    | 0.984          | 0.608–1.592 | 0.947 |
| Rural (ref = urban)                                                        |                |             |       |
| DCCI                                                                       | 0.984          | 0.926–1.045 | 0.597 |
| Hydroxychloroquine pre-index                                               | 1.072          | 0.954–1.205 | 0.241 |
| Leflunomide pre-index                                                      | 0.908          | 0.796–1.036 | 0.151 |
| Methotrexate pre-index                                                     | 1.068          | 0.967–1.179 | 0.197 |
| Sulfasalazine pre-index                                                    | 0.945          | 0.788–1.133 | 0.542 |
| Greater than or equal to one type of targeted DMARD pre-index <sup>a</sup> | 1.030          | 0.855–1.242 | 0.753 |
| Total expenditure pre-index/US\$1,000                                      | 1.000          | 0.997–1.002 | 0.777 |
| RA-related total expenditure pre-index/US\$1,000                           | 0.996          | 0.990–1.002 | 0.214 |
| Office visit count pre-index                                               | 1.006          | 0.991–1.022 | 0.413 |
| PDC for RA medications pre-index                                           | 1.267          | 0.997–1.609 | 0.053 |
| Observations                                                               | 6,945          |             |       |
| C-statistic                                                                | 0.558          |             |       |

| Variable                 | OR ( $\beta$ ) | 95% CI | P |
|--------------------------|----------------|--------|---|
| Pseudo <i>R</i> -squared | 0.00719        |        |   |

**Note:** <sup>a</sup>The number of unique types of targeted DMARDs (reference, one type of targeted DMARD) that used all available claims at any time pre-index; all other pre-index variables were based on the 12-month pre-index period.

**Abbreviations:** CI, confidence interval; DCCI, Deyo–Charlson Comorbidity Index; DMARD, disease-modifying antirheumatic drug; EPO, exclusive provider organization; HMO, health maintenance organization; OR, odds ratio; PDC, proportion of days covered; POS, point of service; PPO, preferred provider organization; RA, rheumatoid arthritis; ref, reference; TNFi, tumor necrosis factor inhibitor.

**Table S4** Multivariable analysis of predictors for treatment effectiveness

| Variable                                                 | OR ( $\beta$ ) | 95% CI      | P      |
|----------------------------------------------------------|----------------|-------------|--------|
| Patient cohort (ref = TNFi cyclers)                      |                |             |        |
| Non-TNFi switchers                                       | 1.195          | 1.053–1.355 | 0.006  |
| Age group, years (ref = 55–64 years)                     |                |             |        |
| 18–34                                                    | 0.786          | 0.627–0.985 | 0.037  |
| 35–44                                                    | 0.814          | 0.690–0.959 | 0.014  |
| 45–54                                                    | 0.930          | 0.818–1.058 | 0.272  |
| Male (ref = female)                                      | 1.261          | 1.098–1.449 | 0.001  |
| Plan type (ref = EPO/PPO)                                |                |             |        |
| Comprehensive/indemnity                                  | 1.054          | 0.788–1.408 | 0.724  |
| HMO                                                      | 0.974          | 0.820–1.156 | 0.759  |
| POS/POS with capitation                                  | 1.057          | 0.870–1.285 | 0.574  |
| Other                                                    | 1.172          | 0.953–1.443 | 0.131  |
| Missing/unknown plan type                                | 1.001          | 0.760–1.319 | 0.992  |
| Index year (ref = 2011)                                  |                |             |        |
| 2010                                                     | 0.988          | 0.853–1.144 | 0.873  |
| 2012                                                     | 0.968          | 0.831–1.126 | 0.672  |
| 2013                                                     | 0.821          | 0.694–0.972 | 0.022  |
| Region (ref = south)                                     |                |             |        |
| Northeast                                                | 0.981          | 0.827–1.164 | 0.828  |
| North Central                                            | 1.167          | 1.009–1.350 | 0.038  |
| West                                                     | 1.070          | 0.917–1.248 | 0.392  |
| Unknown                                                  | 0.923          | 0.513–1.656 | 0.786  |
| Rural (ref = urban)                                      | 1.009          | 0.866–1.176 | 0.907  |
| DCCI                                                     | 0.929          | 0.864–1.001 | 0.052  |
| Hydroxychloroquine pre-index                             | 1.068          | 0.935–1.221 | 0.333  |
| Leflunomide pre-index                                    | 1.057          | 0.907–1.232 | 0.477  |
| Methotrexate pre-index                                   | 1.370          | 1.221–1.538 | <0.001 |
| Sulfasalazine pre-index                                  | 1.010          | 0.817–1.250 | 0.923  |
| Greater than or equal to one type of targeted DMARD pre- | 0.946          | 0.766–1.168 | 0.606  |
| Total expenditure pre-index/US\$1,000                    | 0.995          | 0.992–0.999 | 0.015  |
| RA-related total expenditure pre-index/US\$1,000         | 1.009          | 1.002–1.016 | 0.009  |
| Office visit count pre-index                             | 0.978          | 0.960–0.995 | 0.013  |
| PDC for RA medications pre-index                         | 2.227          | 1.701–2.915 | <0.001 |
| Constant                                                 | 0.202          | 0.156–0.261 | <0.001 |
| Observations                                             | 6,945          |             |        |
| C-statistic                                              | 0.607          |             |        |
| Pseudo R-squared                                         | 0.0233         |             |        |

**Note:** <sup>a</sup>The number of unique types of targeted DMARDs (reference, one type of targeted DMARD) that used all available claims at any time pre- index; all other pre-index variables were based on the 12-month pre-index period.

**Abbreviations:** CI, confidence interval; DCCI, Deyo–Charlson Comorbidity Index; DMARD, disease-modifying antirheumatic drug; EPO, exclusive provider organization; HMO, health maintenance organization; OR, odds ratio; PDC, proportion of days covered; POS, point of service; PPO, preferred provider organization; RA, rheumatoid arthritis; ref, reference; TNFi, tumor necrosis factor inhibitor.
